# Supplementary material
Source: PubMed Central journal article supplement (PMC7751802)
Supplement: NIHMS1646199-supplement-Supplementary_Material.pdf [file NIHMS1646199-supplement-Supplementary_Material.pdf]

## SUPPLEMENTARY MATERIAL

**Supplementary Table 1: Comparison of patient baseline characteristics between those included in present study and those without follow-up data since end of the CALM study**

| <b>Patient Characteristic</b>            | <b>Patients with follow-up data included in present study</b> | <b>Patients with no follow-up data</b> | <b>P value</b> |
|------------------------------------------|---------------------------------------------------------------|----------------------------------------|----------------|
| Mean age, years (SD)                     | 31.2 (11.3)                                                   | 32.1 (12.0)                            | 0.55           |
| Median disease duration, years (IQR)     | 0.2 (0.1-0.5)                                                 | 0.2 (0.1-1.1)                          | 0.29           |
| Female gender, n (%)                     | 72 (59)                                                       | 69 (56.6)                              | 0.70           |
| Median follow-up time, years (range)     | 3.02 (0.05-6.26)                                              | n/a                                    | n/a            |
| Randomized to TC arm, n (%)              | 61 (50)                                                       | 61 (50)                                | 1.0            |
| White race, n (%)                        | 119 (97.5)                                                    | 109 (89.3)                             | 0.08           |
| Disease location, n (%)                  |                                                               |                                        |                |
| Ileal (L1)                               | 19 (15.5)                                                     | 16 (13.1)                              | 0.86           |
| Ileocolonic (L2)                         | 67 (55)                                                       | 69 (56.6)                              |                |
| Colonic (L3)                             | 36 (29.5)                                                     | 37 (30.3)                              |                |
| Prior CD surgery, n (%)                  | 7 (5.7)                                                       | 14 (11.5)                              | 0.17           |
| History stricturing behavior (B2), n (%) | 12 (9.8)                                                      | 20 (16.4)                              | 0.13           |
| Baseline CDEIS score, mean (SD)          | 12.9 (5.9)                                                    | 14.9 (6.9)                             | 0.04           |
| Baseline CDAI score, mean (SD)           | 268.5 (55.3)                                                  | 272.4 (62.3)                           | 0.61           |

IQR: interquartile range; SD: standard deviation; TC: tight control; CD: Crohn's disease;

CDEIS: Crohn's Disease Endoscopic Index of Severity; CDAI: Crohn's Disease Activity

Index; n/a: not applicable

P values for Chi-squared test for categorical variables and two sample t-test or Wilcoxon rank-sum test for continuous variables.

**Supplementary Table 2: Alternative definitions of endoscopic response and remission at end of the CALM study and association with CD disease progression (univariable analysis)**

| <b>Alternative Definition of Endoscopic Response/Remission</b> | <b>HR (95% CI)</b> |
|----------------------------------------------------------------|--------------------|
| CDEIS <4 in every segment at week 48                           | 0.55 (0.24-1.23)   |
| No deep ulcerations at week 48                                 | 0.62 (0.31-1.23)   |
| Decrease from baseline in CDEIS > 5 at Week 48                 | 0.56 (0.28-1.14)   |
| CDEIS=0                                                        | 0.32 (0.09-1.08)   |

CDEIS: Crohn's Disease Endoscopic Index of Severity

**Supplementary Table 3: Impact of Endoscopic and Deep Remission on Individual Components of the Primary Outcome (univariate analysis)**

| <b>Component of Primary Outcome</b> | <b>Endoscopic Remission HR (95% CI)</b> | <b>Deep Remission HR (95% CI)</b> |
|-------------------------------------|-----------------------------------------|-----------------------------------|
| CD-related surgery                  | 0.31 (0.12-0.47)                        | 0.17 (0.00-0.23)                  |
| CD-related hospitalization          | 0.38 (0.24-0.53)                        | 0.18 (0.08-0.25)                  |
| New intestinal stricture            | 0.68 (0.36-1.10)                        | 0.47 (0.21-0.70)                  |

**Supplementary Table 4: Baseline characteristic associations with CD disease progression in deep remission model (multivariate analysis)**

| <b>Variable</b>                                    | <b>HR (95% CI)</b> |
|----------------------------------------------------|--------------------|
| Gender (ref=male)                                  | 1.18 (0.78-1.77)   |
| Age (years)                                        | 0.99 (0.96-1.01)   |
| Smoker (ref=non-smoker at baseline)                | 0.93 (0.53-1.56)   |
| Disease duration (years)                           | 0.69 (0.53-0.81)   |
| IBD surgery prior to CALM                          | 3.83 (1.50-8.16)   |
| Ileal disease (ref=colonic)                        | 1.38 (0.85-2.39)   |
| Ileocolonic disease (ref=colonic)                  | 1.22 (0.63-2.48)   |
| Stricturing Disease Behavior<br>(ref=inflammatory) | 2.18 (1.22-3.78)   |
| Fecal Calprotectin Baseline                        | 1.00 (0.99-1.01)   |
| TC Group (ref=CM)                                  | 1.05 (0.68-1.58)   |

Ref: reference; TC: tight control; CD: Crohn's disease

**Supplementary Figure 1: Standardized survival curves of CD disease progression after end of the CALM study based on deep remission status at end of CALM with 95% confidence intervals based on 1000 bootstrap iterations**

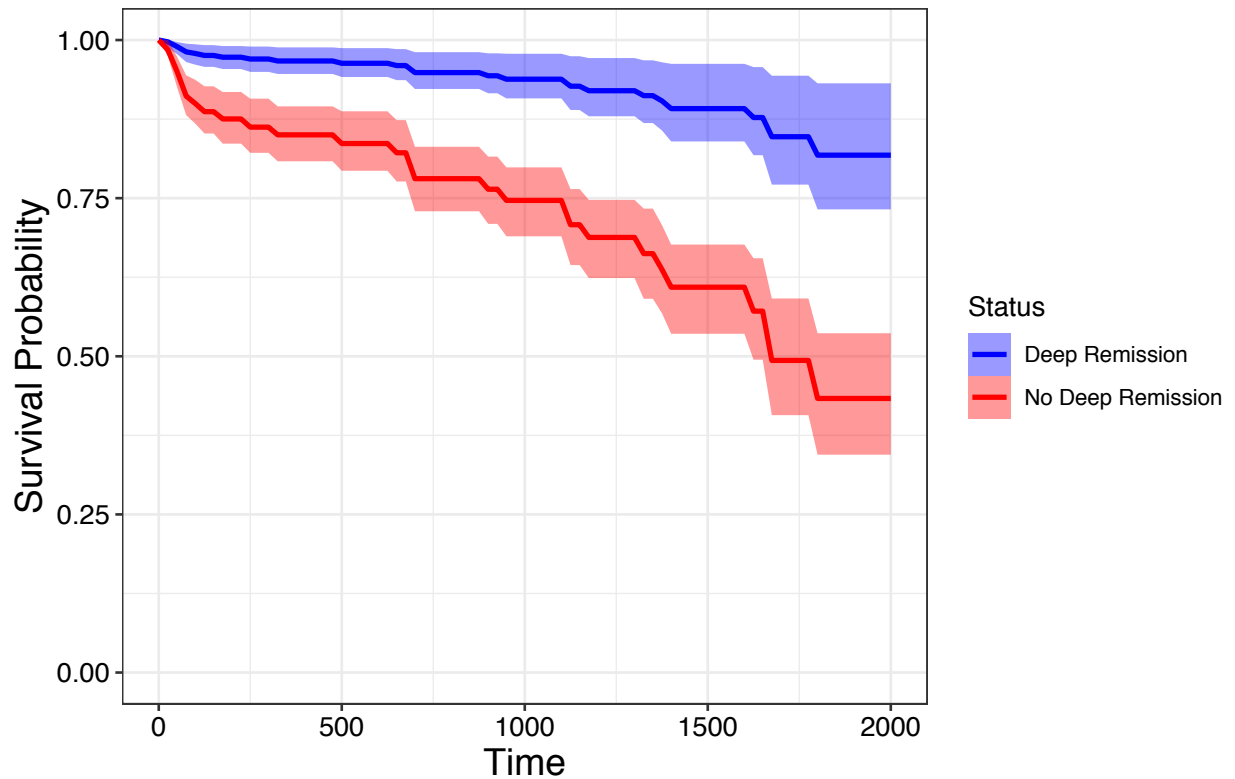

Disease progression defined as any major adverse outcome: composite of new internal fistula/abscess, stricture, perianal fistula/ abscess, CD hospitalization, or CD surgery since end of the CALM study

**Supplementary Figure 2: Kaplan-Meier estimates of CD disease progression after end of the CALM study based on original treatment arm assignment during CALM with 95% confidence interval**

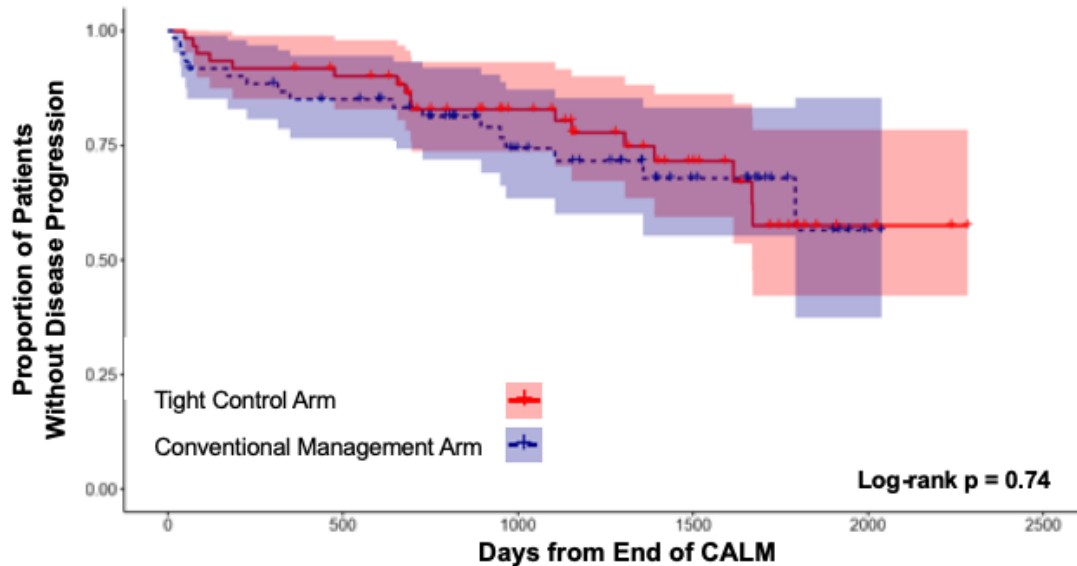

| Number at risk:   | 0  | 500 | 1000 | 1500 | 2000 | 2500 |
|-------------------|----|-----|------|------|------|------|
| Conventional Arm  | 61 | 53  | 36   | 19   | 3    | 0    |
| Tight Control Arm | 61 | 49  | 29   | 14   | 1    | 0    |

Disease progression defined as any major adverse outcome: composite of new internal fistula/abscess, stricture, perianal fistula/ abscess, CD hospitalization, or CD surgery since end of the CALM study
